# Supplementary material for: Phospho-proteomic analysis of primary human colon epithelial cells during the early Trypanosoma cruzi infection phase
Source: PLoS Negl Trop Dis. 2018 Sep 17;12(9):e0006792. doi: 10.1371/journal.pntd.0006792 (PMC6160231; doi:10.1371/journal.pntd.0006792)
Supplement: S2 Table — (XLSX) [file pntd.0006792.s004.xlsx]

## Sheet: S1 Table 
S2 Table: List of all 43 kinase phosphorylation sites of and their relative fold change at different time points in the absence of parasite compared to control.
S N	Phosphoprotein	Phosphorylation site	60 min	90 min	120 min	180 min	Signficance (p Value)
1	Akt1/2/3	S473	1±0.03	1.1±0.04	1.1±0.04	1.1±0.06	NS
2	Akt1/2/3	T308	1±0	1.1±0	1.1±0.01	1.1±0.02	NS
3	AMPKα1	T183	1±0.02	1.1±0.03	1.1±0	1±0.02	NS
4	AMPKα2	T172	1±0.01	1.1±0.06	1.2±0.04	1.1±0.06	NS
5	Chk-2	T68	1±0.01	1.1±0.07	1.2±0.01	1±0.07	NS
6	c-Jun	S63	1±0.05	1.1±0.03	1±0.02	1.1±0.01	NS
7	CREB	S133	1±0.04	1±0.01	1.1±0.04	1.1±0.09	NS
8	EGFR	Y1086	1±0.07	1.1±0.04	1.2±0.05	1.1±0	NS
9	eNOS	S1177	1±0.01	1±0.01	1.1±0.02	1±0.01	NS
10	ERK1/2	T202/Y204, T185/Y187	1±0.03	1.1±0.07	1.1±0	1±0.01	NS
11	FAK	Y397	1±0	1.1±0.02	1.1±0.01	1±0.01	NS
12	Fgr	Y412	1±0.01	1.1±0.02	1.1±0.02	1±0.02	NS
13	Fyn	Y709	1±0.03	1±0.04	1.1±0.09	1.2±0.07	NS
14	GSK-3α/β	S21/S9	1.2±0.07	1.1±0.11	1.2±0.05	1.1±0.07	NS
15	HcK	Y411	0.8±0.17	1.1±0.01	1.2±0.09	1.1±0.03	NS
16	HSP27	S78/S82	1±0.01	1.1±0.03	1.1±0.01	1.1±0.01	NS
17	HSP60		1±0.09	1.1±0.02	1.1±0.04	1.1±0.04	NS
18	JNK1/2/3	T183/Y185, T221/Y223	0.9±0.12	1±0.18	1.1±0	1.1±0.11	NS
19	Lck	Y394	0.9±0.01	1±0.02	1.1±0.05	1±0.07	NS
20	Lyn	Y397	1±0.04	1±0.05	1.1±0.07	1.1±0.08	NS
21	MSK1/2	S376/S360	1.2±0.18	1.2±0.34	1.1±0.22	1.2±0.19	NS
22	p27	T198	1±0	1.1±0	1.1±0.01	1.1±0	NS
23	p38α	T180/Y182	0.9±0.35	1±0.27	1.1±0.04	1.2±0	NS
24	p53	S392	1±0.03	1.1±0.01	1.2±0	1.1±0.02	NS
25	p53	S15	1±0.03	1.2±0.02	1.2±0.01	1.1±0.03	NS
26	p53	S46	1±0.02	1.1±0.01	1.1±0.02	1.1±0.01	NS
27	p70 S6 Kinase	T389	1±0.01	1.1±0.01	1.2±0.02	1.1±0.03	NS
28	p70 S6 Kinase	T421/S424	1±0.01	1.1±0.03	1.2±0.01	1.1±0.01	NS
29	PDGF Rβ	Y751	1±0.01	1.1±0.02	1.1±0.01	1.1±0.02	NS
30	PLC-γ1	Y783	1±0.03	1.1±0.01	1.1±0.02	1.1±0.03	NS
31	PRAS40	T246	1.1±0.02	1.2±0.01	0.8±0.3	1.1±0.31	NS
32	PYK2	Y402	1±0	1.1±0.01	1±0.01	1.1±0.03	NS
33	RSK1/2/3	S3880/S386/S377	1±0.03	1.1±0.03	1.1±0.06	1.1±0.01	NS
34	Src	Y419	1±0.04	1±0.03	1.1±0.03	1.1±0	NS
35	STAT2	Y689	0.9±0.06	1.1±0.02	1.1±0.03	1.1±0.02	NS
36	STAT3	Y705	1±0.03	1.1±0.01	1.2±0.03	1.1±0.02	NS
37	STAT3	S727	1±0.03	1.1±0.02	1.2±0.03	1.1±0	NS
38	STAT5a	Y694	1±0.03	1±0.01	1.2±0.05	1.1±0.06	NS
39	STAT5a/b	Y694/Y699	1±0.02	1.1±0.04	1.2±0.01	1.2±0.01	NS
40	STAT5b	Y699	1.1±0.02	1.2±0.02	1.1±0.06	1.2±0.07	NS
41	STAT6	Y641	0.9±0.03	1±0.15	1.2±0.04	1±0.14	NS
42	TOR	S2248	1±0.16	1±0.01	1.1±0.09	0.9±0.1	NS
43	WNK1	T60	1±0	1.1±0.01	1±0.02	1.1±0.01	NS
44	Yes	Y426	1±0.02	1.1±0.05	1.1±0.03	1.1±0.05	NS
45	β-Catenin		1±0.02	1.1±0.02	1.1±0.01	1.1±0.05	NS
							NS = Non Significant
